# Supplementary material for: Comparative Analysis of Predicted Plastid-Targeted Proteomes of Sequenced Higher Plant Genomes
Source: PLoS One. 2014 Nov 13;9(11):e112870. doi: 10.1371/journal.pone.0112870 (PMC4231079; doi:10.1371/journal.pone.0112870)
Supplement: File S4 — Plastid-targeted proteins unique to each examined species with GO term information. Excel file containing the header information and associated GO terms. (XLS) [file pone.0112870.s004.xls]

## Sheet: All At Loci
GreenCut2	UCLUST 50%	USEARCH4040
At5g57030	At3g17850	At1g80070
At1g14030	At1g09570	At1g06490
At5g52520	At2g18790	At1g59870
At3g59890	At4g16250	At1g58060
At2g44040	At5g35840	At1g66950
At4g08390	At1g80070	At1g15210
At4g22260	At1g06490	At1g15520
At1g32200	At2g13680	At1g58050
At1g69720	At3g59100	At1g02890
At2g26670	At1g06430	At1g02730
At1g32500	At2g30950	At1g62130
At4g05390	At5g15250	At1g06950
At1g30510	At2g25320	At1g79560
At3g08010	At2g25330	At1g18370
At2g20890	At5g51070	At1g08720
At4g33680	At1g11800	At1g72520
At5g66570	At1g62180	At1g12430
At3g50820	At4g04610	At1g17420
At3g25860	At4g21990	At1g67560
At5g38660	At4g15530	At1g01950
At4g16155	At1g21730	At1g21730
At3g16950	At3g44050	At1g63700
At1g08520	At1g18170	At1g68020
At1g32060	At1g15210	At1g06410
At2g40490	At1g15520	At1g67930
At1g02560	At1g59870	At1g13170
At5g28840	At1g66950	At1g26150
At2g05620	At3g16340	At1g23540
At2g43560	At1g64860	At1g50250
At5g13410	At1g64880	At1g09600
At3g01480	At5g17520	At1g70460
At5g24000	At4g29790	At1g49270
At5g47860	At5g46290	At1g53050
At5g52970	At4g25540	At1g06430
At1g16080	At3g23670	At1g17440
At2g39080	At4g14150	At1g50260
At1g73060	At3g12590	At1g52420
At4g11960	At1g02890	At1g73170
At4g22890	At4g02480	At1g49890
At2g21960	At2g41830	At1g78390
At2g48070	At5g21080	At1g71530
At2g45990	At1g27510	At1g08050
At5g50100	At5g62840	At1g09420
At1g64355	At5g11490	At1g26230
At4g19100	At1g02730	At1g32900
At3g60810	At2g33100	At1g55490
At1g54520	At3g03050	At1g22020
At3g17930	At4g38190	At1g24280
At2g47840	At5g16910	At1g36370
At2g43945	At1g03910	At1g31800
At3g26710	At3g18630	At1g38131
At5g53580	At3g19895	At1g30100
At2g27680	At3g19900	At1g23190
At1g06690	At1g19740	At1g57770
At3g61870	At1g75460	At1g32440
At5g03900	At3g07100	At1g35510
At5g17670	At3g44340	At1g51190
At3g48420	At4g32640	At1g12000
At3g09580	At5g12150	At1g23400
At2g22650	At5g19390	At1g14970
At2g46580	At2g30390	At1g76040
At4g33110	At3g20150	At1g07280
At4g33120	At2g33450	At1g18890
At3g57810	At5g13390	At1g74960
At1g79630	At1g23730	At1g44446
At1g16220	At1g70410	At1g51440
At1g16720	At3g01500	At1g48860
At1g70070	At3g01510	At1g47670
At4g39120	At5g14740	At1g27680
At1g50450	At2g17220	At1g06800
At3g10350	At4g35600	At1g13960
At4g29590	At1g65280	At1g52290
At4g24810	At3g23940	At1g12330
At5g50330	At5g24000	At1g07270
At4g13250	At5g52540	At1g16440
At1g54310	At5g26030	At1g24490
At5g21920	At1g13460	At1g47840
At5g20140	At3g09880	At1g13460
At3g60800	At3g26020	At1g59650
At1g71480	At3g54930	At1g10410
At1g03600	At2g01140	At1g76360
At4g35760	At2g21330	At1g14030
At5g36120	At4g38970	At1g32500
At3g24190	At1g05610	At1g38065
At1g78620	At2g44050	At1g14580
At1g12250	At1g25500	At1g74470
At3g26070	At3g12250	At1g15980
At3g26080	At4g29060	At1g44110
At5g60750	At2g28620	At1g02910
At5g64940	At3g45850	At1g72540
At5g35220	At1g06950	At1g15730
At3g13490	At1g09840	At1g42970
At3g17040	At1g57870	At1g67820
At4g03280	At1g79560	At1g80480
At4g27440	At4g29750	At1g77390
At5g54190	At3g02060	At1g48850
At4g25080	At3g29320	At1g14370
At1g09130	At3g08960	At1g61590
At3g51820	At2g25140	At1g48450
At4g32770	At5g15450	At1g79530
At1g54500	At4g14330	At1g09840
At4g14210	At1g01950	At1g16300
At4g04850	At1g12430	At1g57870
At3g19720	At1g61800	At1g24530
At2g26540	At4g03950	At1g16610
At5g33320	At5g54800	At1g08250
At4g31780	At1g08720	At1g26970
At4g35440	At1g06410	At1g08510
At1g53240	At1g68020	At1g10700
At3g15020	At4g17770	At1g07570
At3g52200	At1g18370	At1g32160
At5g66990	At1g09600	At1g30120
At2g37970	At1g53050	At1g62640
At4g11570	At5g44290	At1g03630
At5g62840	At5g17170	At1g32380
At2g41040	At3g04260	At1g74490
At5g03880	At3g22690	At1g12900
At2g18950	At1g63700	At1g07120
At5g53490	At2g14120	At1g11790
At5g19850	At4g33650	At1g43800
At1g13820	At4g02260	At1g61800
At1g22850	At3g56040	At1g49970
At1g57770	At1g67930	At1g69790
At2g44920	At2g29650	At1g30510
At3g11560	At4g00370	At1g76370
At5g06220	At5g38560	At1g33290
At4g13590	At5g20930	At1g75330
At2g27290	At5g13030	At1g78090
At3g07670	At5g13800	At1g13270
At1g04620	At5g43210	At1g20020
At1g25290	At5g66090	At1g35910
At1g19690	At5g02830	At1g51660
At1g15140	At4g32770	At1g25560
At2g38780	At3g18390	At1g66200
At1g76060	At2g18940	At1g78140
At5g47010	At1g13170	At1g68840
At5g41380	At1g77730	At1g67280
At4g17040	At2g31020	At1g80670
At5g18660	At4g08180	At1g13260
At3g63520	At3g21650	At1g45688
At3g11670	At4g15415	At1g63610
At2g21340	At2g24050	At1g13440
At2g40100	At5g57870	At1g32730
At2g30570	At1g14970	At1g76570
At3g47470	At1g35510	At1g24360
At1g10700	At2g01480	At1g79700
At2g43710	At1g52420	At1g69526
At4g28660	At3g15940	At1g69523
At4g37200	At2g20020	At1g02560
At3g59400	At1g32380	At1g31220
At3g63140	At2g35390	At1g16880
At1g64150	At2g44530	At1g18440
At3g50685	At5g58230	At1g54780
At3g50690	At4g33630	At1g11840
At2g23370	At1g69526	At1g18490
At2g21385	At3g09650	At1g70410
At2g35610	At3g22960	At1g12410
At5g47430	At3g13490	At1g19150
At4g17410	At2g06050	At1g29910
At4g33630	At2g42520	At1g29920
At4g24090	At3g58510	At1g29930
At5g67370	At3g58570	At1g77730
At1g67080	At1g44446	At1g06680
At5g27290	At5g01830	At1g44000
At1g44920	At3g19420	At1g60000
At5g48370	At5g13550	At1g67810
At2g30720	At2g17890	At1g15820
At1g59990	At4g36070	At1g23730
At1g03905	At5g66210	At1g26160
At5g44110	At1g26230	At1g45474
At3g06730	At1g55490	At1g13280
At5g38360	At3g13470	At1g18170
At4g26160	At5g56500	At1g35680
At4g31530	At2g46090	At1g67080
At2g35800	At2g46100	At1g03130
At5g02250	At1g78090	At1g65620
At3g51520	At4g12430	At1g32550
At1g28370	At4g22590	At1g01250
At3g05625	At5g51460	At1g07900
At5g62740	At5g65140	At1g68490
At1g69840	At1g24280	At1g67090
At3g01290	At5g13110	At1g03680
At4g15180	At5g35790	At1g01370
At1g26761	At3g11590	At1g50900
At2g21860	At5g48130	At1g03600
At5g05200	At2g22450	At1g76760
At4g00030	At5g59750	At1g76100
At1g30680	At5g64300	At1g68730
At3g02380	At1g48860	At1g42960
At2g46100	At2g45300	At1g20340
At1g34000	At5g03940	At1g43560
At1g76340	At3g48560	At1g75440
At5g19980	At5g08415	At1g45050
At5g17170	At5g08540	At1g52220
At1g55480	At3g24550	At1g77750
At1g66670	At1g79700	At1g10960
At4g32320	At1g49890	At1g60950
At1g68830	At3g19570	At1g52230
At3g09740	At1g30100	At1g54690
At4g03550	At1g78390	At1g08880
At4g04970	At3g14440	At1g15850
At3g52850	At4g18350	At1g79040
At2g14720	At1g23190	At1g08380
At2g14740	At5g51820	At1g19890
At2g30290	At1g12330	At1g54630
At4g10340	At3g55400	At1g54580
At5g42390	At2g44990	At1g13370
At5g22620	At4g18570	At1g75600
At5g23240	At4g02930	At1g09200
At2g04700	At4g20360	At1g19510
At5g13510	At1g67840	At1g26945
At4g38800	At3g27740	At1g74500
At3g53090	At2g39730	At1g43310
At3g51870	At1g32900	At2g13680
At5g46420	At3g12930	At2g25320
At5g54290	At5g01330	At4g14150
At5g08650	At3g14900	At4g24450
At3g03890	At3g55800	At4g02480
At1g80770	At2g21280	At4g24860
At1g04850	At1g12000	At4g38190
At4g22830	At4g26900	At4g32410
At1g51110	At5g48730	At4g25540
At4g32590	At2g36990	At4g32640
At3g02410	At2g28000	At2g21380
At5g15860	At5g18820	At4g39050
At4g35450	At1g07280	At2g28620
At2g17390	At2g29670	At2g37420
At2g34460	At3g47080	At2g33100
At4g15520	At1g38065	At2g41830
At5g05210	At1g38131	At2g25140
At1g07010	At1g51190	At4g29060
At4g30720	At5g13260	At4g14330
At1g26760	At1g02910	At4g17770
At4g10300	At2g36500	At4g08630
At3g06980	At3g52950	At4g29750
At1g49820	At5g50530	At2g18940
At4g13850	At5g50640	At4g08180
At1g48310	At5g63490	At2g14120
At3g01060	At3g48420	At4g33650
At4g01995	At4g04770	At4g25070
At5g19050	At5g44316	At2g31020
At1g10760	At2g32040	At2g20020
At1g06950	At2g26100	At2g30950
At4g30580	At5g48300	At2g25330
At1g08380	At3g20410	At4g33630
At4g17090	At4g21940	At4g34440
At4g00850	At4g23650	At2g26920
At1g32550	At4g23100	At4g18570
At1g04750	At1g45050	At2g37980
At1g04760	At1g75440	At2g18470
At2g32670	At5g42990	At2g42520
At2g33120	At4g16820	At2g44990
At2g38620	At1g61590	At4g22030
At3g54180	At2g05940	At2g02070
At5g08450	At3g55450	At4g26900
At1g16870	At5g01020	At2g28000
At5g61670	At1g47670	At4g18350
At4g01883	At1g11840	At2g38910
At1g28140	At1g67280	At2g31500
At3g01920	At3g63130	At2g17890
At2g42880	At5g19320	At2g01480
At3g03940	At5g42650	At2g32040
At5g18190	At5g55220	At4g04770
At5g56730	At1g06800	At4g21940
At2g40860	At1g51440	At4g17090
At2g46170	At2g30550	At2g36990
At1g64090	At5g13840	At4g00370
At4g11220	At2g27680	At2g29680
At4g23630	At3g02750	At2g36500
At5g41600	At5g36250	At2g29670
At5g08340	At2g37680	At4g36070
At5g23330	At2g26700	At4g23650
At3g24050	At3g46780	At4g32520
At2g46910	At5g24120	At2g30550
At3g21140	At1g14030	At2g26700
At4g05180	At5g58330	At2g21590
At4g21280	At1g13960	At4g15415
At2g28605	At1g76370	At4g23100
At5g40500	At3g24790	At4g39210
At3g19900	At5g02800	At2g45300
At2g47970	At5g18610	At2g38470
At3g63000	At1g19920	At4g37930
At1g18170	At3g22890	At4g16820
At2g15290	At4g14680	At2g02080
At2g32040	At5g43780	At2g29650
At3g47390	At2g01940	At2g30390
At5g28750	At1g13440	At2g19860
At4g37270	At1g16300	At4g29130
At1g50320	At1g79530	At4g32770
At3g52880	At4g16490	At4g22910
At1g02280	At1g32500	At4g33030
At3g04030	At4g33030	At4g20360
At5g18240	At2g38630	At4g11920
At1g51650	At3g54190	At2g39730
At1g53540	At1g24530	At4g16490
At3g46230	At1g74470	At2g33610
At5g59720	At1g15980	At4g03415
At5g20040	At5g47070	At2g38630
At2g39930	At1g15730	At2g05940
At4g15530	At1g80480	At2g28800
At5g04360	At3g01060	At4g02930
At5g57040	At3g11170	At2g01940
At2g34860	At5g05580	At2g34650
At4g18810	At1g62640	At2g02800
At1g14270	At1g43800	At4g18480
At1g16320	At2g43710	At2g27820
At2g46220	At3g02610	At2g28930
At1g53120	At3g02620	At4g35600
At1g54780	At3g02630	At2g17220
At3g02290	At5g16230	At4g25990
At1g65070	At5g16240	At4g29100
At1g18480	At1g12900	At2g34590
At4g09730	At1g42970	At2g35390
At5g51180	At3g26650	At4g02670
At1g10040	At1g45688	At4g27440
At1g21000	At1g48850	At2g43710
At1g76590	At2g45770	At2g21330
At3g08640	At1g07570	At4g04480
At3g08630	At1g14370	At4g38970
At5g22790	At2g02800	At2g39660
At3g01180	At2g28930	At2g44530
At5g45040	At2g39660	At2g40490
At2g39730	At5g02290	At2g25620
At3g54890	At2g33180	At2g06050
At1g12230	At3g11630	At2g01140
At4g23100	At5g06290	At2g27680
At1g76080	At1g66200	At2g33880
At5g46290	At5g35630	At4g05390
At1g61520	At5g12040	At4g36530
At1g55670	At4g18480	At4g22590
At1g49970	At5g45930	At4g35760
At5g17520	At3g12710	At2g26100
At5g17523	At5g44680	At4g12430
At4g33950	At3g11410	At2g45770
At1g53650	At5g59220	At4g26530
At5g26570	At1g08510	At2g44810
At1g08980	At1g13260	At2g41040
At5g11260	At1g25560	At4g37040
At2g35500	At1g68840	At2g21280
At5g58330	At3g25730	At2g28760
At3g07770	At1g03130	At2g43950
At1g76570	At4g02770	At4g02800
At3g27080	At1g30120	At4g24770
At3g27730	At2g34590	At4g32320
At5g57850	At3g01550	At4g22890
At5g16620	At5g33320	At2g42380
At2g33540	At3g47520	At2g04360
At1g73110	At5g09660	At4g11960
At3g16140	At1g75330	At2g24060
At1g52230	At5g52100	At4g25700
At1g67740	At1g13270	At2g21940
At4g17600	At3g25740	At2g22870
At1g44575	At4g37040	At4g21450
At5g44520	At1g24360	At2g37220
At4g14690	At1g63610	At4g05060
At3g46740	At1g03630	At4g30690
At5g46110	At4g27440	At4g10340
At3g25110	At5g54190	At2g24490
At4g13050	At2g40490	At4g03950
At4g20380	At1g49970	At2g33270
At5g19220	At1g50900	At4g11910
At5g64290	At1g51660	At4g22920
At5g48300	At3g21220	At2g34430
At1g67090	At3g03890	At2g34420
At5g38420	At3g63490	At2g05070
At5g38430	At1g32550	At2g05100
At1g03130	At3g28460	At4g39610
At4g02770	At5g52970	At4g17600
At1g31330	At4g35760	At2g40300
At2g30950	At5g17710	At2g21990
At1g06430	At4g36530	At2g46220
At2g27510	At2g28760	At2g39470
At4g12800	At3g46440	At4g34120
At3g56940	At5g59290	At4g25910
At5g64860	At1g19150	At2g25080
At2g20260	At3g61470	At4g36910
At1g49380	At5g28450	At4g09650
At1g69390	At1g20020	At4g31870
At4g33520	At5g66190	At4g11600
At1g30380	At4g05060	At2g28500
At3g20320	At4g21450	At4g05180
At1g44446	At5g54110	At4g03280
At3g12270	At1g60000	At4g00220
At1g06680	At5g27560	At4g17560
At2g30790	At3g09210	At4g24930
At3g05480	At4g02800	At4g21280
At1g26940	At2g42380	At2g22230
At5g11450	At3g58120	At4g12800
At3g56650	At1g12410	At4g27990
At3g10060	At1g80040	At2g36680
At3g15520	At5g32440	At2g41410
At1g20810	At2g41040	At2g37680
At4g15510	At4g11960	At4g02770
At4g14890	At4g22890	At2g25605
At3g60370	At1g02560	At4g18610
At1g19970	At4g25700	At4g03520
At1g75760	At5g52570	At4g13200
At2g21190	At1g11360	At2g24020
At4g38790	At2g04360	At4g35770
At1g74070	At2g46220	At4g30620
At4g31040	At5g61410	At4g16750
At2g20920	At4g11910	At2g46820
At5g04440	At4g22920	At4g02725
At2g17972	At4g09650	At4g40030
At3g58800	At2g21940	At4g36040
At1g64680	At4g10340	At4g34590
At5g11960	At3g62030	At2g27510
At1g19360	At5g13120	At2g20260
At1g75110	At1g29910	At4g34290
At5g05360	At1g29920	At2g33450
At4g24930	At1g29930	At4g28750
At5g39790	At2g05070	At2g14880
At1g08030	At2g05100	At4g25050
At1g07040	At2g34420	At4g40040
At1g50020	At2g34430	At2g38810
At5g55570	At3g27690	At2g30790
At2g17240	At5g54270	At2g38140
At5g08540	At1g54780	At2g06520
At1g74530	At1g67080	At4g17310
At1g28100	At2g25080	At4g10265
At5g13500	At4g31870	At2g32190
At4g29520	At1g06680	At4g33865
At1g62780	At2g30790	At3g14570
At1g42430	At3g25920	At3g59100
At1g77090	At3g56650	At3g16340
At3g57280	At1g15820	At3g23670
At5g24690	At1g35680	At3g17850
At3g10405	At2g39470	At3g44050
At1g50900	At2g36680	At3g03050
At5g27710	At3g53120	At3g61780
At1g49975	At3g59400	At3g20150
At4g04330	At4g17560	At3g44340
At5g48790	At5g47190	At3g45850
At4g24610	At5g20720	At3g07100
At1g65230	At1g13280	At3g08960
At1g05385	At3g25760	At3g12020
At5g44650	At3g25770	At3g29320
At4g25660	At3g25780	At3g48870
At4g25680	At5g19140	At3g54870
At4g22920	At3g43980	At3g22690
At4g11910	At3g44010	At3g04260
At4g11911	At4g33865	At3g45140
At4g26410	At2g24020	At3g56040
At3g56040	At4g30620	At3g18390
At5g13940	At3g47470	At3g09650
At1g67600	At4g25910	At3g18810
At1g24350	At5g49940	At3g15940
At4g29400	At3g55330	At3g07700
At3g61770	At4g05180	At3g19830
At3g51140	At4g21280	At3g10420
At1g78915	At3g15360	At3g48560
At5g58250	At2g22230	At3g24550
At1g08530	At5g10160	At3g58570
At5g39660	At4g24930	At3g10660
At2g38270	At1g07900	At3g19570
At1g68410	At2g28500	At3g55150
At3g53220	At5g11260	At3g01085
At3g23700	At4g03280	At3g11590
At5g17060	At2g25605	At3g55400
At3g03120	At1g09200	At3g58510
At5g10630	At1g13370	At3g14900
At5g17630	At1g19890	At3g19420
At5g01930	At1g75600	At3g13490
At3g07400	At3g27360	At3g50530
At5g64150	At4g40030	At3g14440
At1g52510	At4g40040	At3g19100
At4g20460	At5g10390	At3g13470
At3g01660	At5g10400	At3g22960
At1g21070	At5g10980	At3g05050
At1g76670	At5g65350	At3g27580
At5g42420	At5g65360	At3g24220
At2g26660	At4g12800	At3g12690
At5g20150	At3g26060	At3g23920
At4g35360	At3g13120	At3g47450
At2g17320	At1g03600	At3g02810
At2g17340	At3g15190	At3g52950
At5g20380	At4g13220	At3g21650
At5g50550	At2g46820	At3g20410
At2g03670	At1g68490	At3g53130
At5g51110	At2g20260	At3g63130
At5g44590	At4g28750	At3g26020
At5g44600	At4g02725	At3g02750
At4g17760	At5g52960	At3g47080
At5g43560	At1g20340	At3g29180
At5g27280	At1g76100	At3g46780
At5g53570	At5g14320	At3g09880
At1g11800	At1g08880	At3g54930
At5g45360	At1g54690	At3g01015
At1g50575	At2g38810	At3g54190
At5g19940	At3g02900	At3g03740
At4g09620	At5g16660	At3g01060
At3g59780	At1g19510	At3g50700
At2g31140	At4g39250	At3g44610
At1g66170	At1g52230	At3g11170
At5g24650	At3g16140	At3g54320
At3g49560	At1g79040	At3g26940
At1g67270	At2g38140	At3g27740
At1g69210		At3g17800
At2g42770		At3g44720
At1g71500		At3g14930
At1g22700		At3g09830
At3g25470		At3g43700
At1g19600		At3g02610
At5g27560		At3g47520
At5g35100		At3g02620
At5g04910		At3g11410
At1g76450		At3g02630
At2g05310		At3g26650
At4g13500		At3g55800
At2g31040		At3g55450
At1g59840		At3g62260
At2g04360		At3g01550
At3g61680		At3g07630
At3g14110		At3g24790
At1g66240		At3g51470
At1g32050		At3g05640
At4g00026		At3g52930
At1g69830		At3g21220
At5g38410		At3g01500
At3g44890		At3g63490
At1g76100		At3g25740
At5g55220		At3g53460
At3g15190		At3g46440
At4g35080		At3g09210
At2g16800		At3g25730
At2g33450		At3g58120
At5g46390		At3g03890
At5g52110		At3g48420
At3g55330		At3g28460
At5g42480		At3g62030
At4g32260		At3g12710
At1g12410		At3g48750
At1g52530		At3g25920
At1g19025		At3g03760
At3g54010		At3g11630
At5g02120		At3g27690
At1g64530		At3g59400
At5g61880		At3g56650
At3g59280		At3g56090
At5g66130		At3g25780
At2g47450		At3g61470
At5g51220		At3g60490
At5g57160		At3g25760
At3g06310		At3g25770
At5g18800		At3g11050
At2g19570		At3g47470
At5g04620		At3g54890
At4g24190		At3g07430
At5g28210		At3g55330
At3g09100		At3g53120
At5g01290		At3g26060
At2g30970		At3g10190
At4g11120		At3g50770
At5g25752		At3g15190
At3g24315		At3g04510
At1g12770		At3g15360
At2g21530		At3g27840
At5g21990		At3g27830
At4g22140		At3g13120
At4g04260		At3g27850
At4g28020		At3g02730
At3g06170		At3g11090
At1g16180		At3g02900
At5g17240		At3g44020
At5g42320		At3g17609
At4g34150		At3g16140
At3g17470		At3g23230
At5g04740		At3g05020
At5g19430		At3g47650
At1g24610		At3g27360
At4g02600		At3g28857
At2g44020		At3g47710
At1g02870		At3g15352
At1g26220		At3g44010
At3g07430		At3g43980
At3g02690		At5g53460
At5g14100		At5g04140
At5g52440		At5g16910
At4g01940		At5g21080
At5g19620		At5g06670
At3g26085		At5g15450
At2g35840		At5g04810
At1g51420		At5g50920
At3g52340		At5g19390
At4g35250		At5g02830
At3g24800		At5g11490
At1g15870		At5g12150
At1g80720		At5g64940
At5g27600		At5g42270
At3g05970		At5g20930
At5g58870		At5g15250
At3g47060		At5g13550
At5g47140		At5g01830
At3g01540		At5g35570
At1g50000		At5g44290
At4g37750		At5g39420
At3g43240		At5g13030
At2g27470		At5g01100
At1g47750		At5g48130
At1g17520		At5g51820
At5g19360		At5g56500
At5g21010		At5g13110
At3g03740		At5g40200
At3g43700		At5g01330
At3g23080		At5g35170
At4g14500		At5g47750
At2g25900		At5g35790
At5g23060		At5g18820
At2g32520		At5g23700
At1g27330		At5g03940
At1g27350		At5g57390
At1g31870		At5g50530
At4g00231		At5g50640
At1g72040		At5g55220
At1g16240		At5g19320
At1g79590		At5g63490
At2g27100		At5g13260
At3g01640		At5g12480
At5g14470		At5g66210
At5g09380		At5g19220
At1g30130		At5g48300
At4g34730		At5g42650
At5g13830		At5g24120
At3g52155		At5g18610
At5g03760		At5g48730
At5g22740		At5g25510
At1g60230		At5g40030
At4g23620		At5g55910
At3g44340		At5g15510
At4g32640		At5g13840
At2g26590		At5g46290
At4g13870		At5g44316
At3g18524		At5g44160
At4g00690		At5g26030
At4g15880		At5g64090
At5g56900		At5g36250
At5g26110		At5g58330
At1g04635		At5g25380
At1g65280		At5g05580
At5g47690		At5g57180
At5g63440		At5g17640
At4g01150		At5g35630
At4g15790		At5g22630
At2g35810		At5g03320
At2g35820		At5g45930
At2g35830		At5g18660
At3g56330		At5g17630
At5g44450		At5g51760
At2g39650		At5g59220
At5g65950		At5g47070
At4g28030		At5g01020
At3g27530		At5g33320
At1g78995		At5g19000
At1g24310		At5g54190
At5g64816		At5g16230
At3g51510		At5g16240
At3g07560		At5g02290
At3g04560		At5g54800
At5g41950		At5g51460
At1g36320		At5g02800
At1g27385		At5g65140
At1g34630		At5g10100
At4g38225		At5g12040
At5g13390		At5g09660
At5g25265		At5g66190
At5g57370		At5g59290
At2g25310		At5g44680
At4g32130		At5g57970
At3g59630		At5g08540
At3g02790		At5g27560
At5g16470		At5g65670
At2g27280		At5g23530
At2g27285		At5g14740
At3g07790		At5g39220
At3g56690		At5g62910
At1g53800		At5g17710
At1g21780		At5g45980
		At5g42860
		At5g11480
		At5g52570
		At5g07950
		At5g04740
		At5g52100
		At5g20190
		At5g28150
		At5g50250
		At5g37720
		At5g47840
		At5g61410
		At5g16390
		At5g06290
		At5g17170
		At5g54110
		At5g54270
		At5g32440
		At5g06990
		At5g52440
		At5g13120
		At5g47110
		At5g15530
		At5g01600
		At5g20720
		At5g61440
		At5g59950
		At5g49940
		At5g19140
		At5g47190
		At5g51990
		At5g52970
		At5g10160
		At5g19830
		At5g41960
		At5g66090
		At5g38410
		At5g63090
		At5g16400
		At5g58500
		At5g38430
		At5g38420
		At5g28450
		At5g52960
		At5g14320
		At5g11260
		At5g16660
		At5g42990
		At5g02020
		At5g10000
		At5g28750
		At5g27200
		At5g65350
		At5g65360
		At5g10390
		At5g10400
		At5g10980
		At5g66040
		At5g15160
		At5g39860
																			isoform-like
																			isoform-like
																			isoform-like
																			isoform-like
																			isoform-like

## Sheet: Unique At Loci
Loci Only in GreenCut2	Loci Only in USEARCH4040	Loci Only in UCLUST 50
At5g57030	At1g58060	At1g09570
At5g52520	At1g58050	At2g18790
At3g59890	At1g62130	At4g16250
At2g44040	At1g72520	At5g35840
At4g08390	At1g17420	At5g51070
At4g22260	At1g67560	At1g62180
At1g32200	At1g26150	At4g04610
At1g69720	At1g23540	At4g21990
At2g26670	At1g50250	At1g64860
At3g08010	At1g70460	At1g64880
At2g20890	At1g49270	At4g29790
At4g33680	At1g17440	At3g12590
At5g66570	At1g50260	At1g27510
At3g50820	At1g73170	At1g03910
At3g25860	At1g71530	At3g18630
At5g38660	At1g08050	At3g19895
At4g16155	At1g09420	At1g19740
At3g16950	At1g22020	At1g75460
At1g08520	At1g36370	At3g01510
At1g32060	At1g31800	At3g23940
At5g28840	At1g32440	At5g52540
At2g05620	At1g23400	At1g05610
At2g43560	At1g76040	At2g44050
At5g13410	At1g18890	At1g25500
At3g01480	At1g74960	At3g12250
At5g47860	At1g27680	At3g02060
At1g16080	At1g52290	At4g02260
At2g39080	At1g07270	At5g38560
At1g73060	At1g16440	At5g13800
At2g21960	At1g24490	At5g43210
At2g48070	At1g47840	At2g24050
At2g45990	At1g59650	At5g57870
At5g50100	At1g10410	At5g58230
At1g64355	At1g76360	At2g46090
At4g19100	At1g14580	At2g22450
At3g60810	At1g44110	At5g59750
At1g54520	At1g72540	At5g64300
At3g17930	At1g67820	At5g08415
At2g47840	At1g77390	At1g67840
At2g43945	At1g48450	At3g12930
At3g26710	At1g16610	At1g19920
At5g53580	At1g08250	At3g22890
At1g06690	At1g26970	At4g14680
At3g61870	At1g32160	At5g43780
At5g03900	At1g74490	At2g33180
At5g17670	At1g07120	At1g80040
At3g09580	At1g11790	At1g11360
At2g22650	At1g69790	At4g13220
At2g46580	At1g33290	At4g39250
At4g33110	At1g35910
At4g33120	At1g78140
At3g57810	At1g80670
At1g79630	At1g32730
At1g16220	At1g69523
At1g16720	At1g31220
At1g70070	At1g16880
At4g39120	At1g18440
At1g50450	At1g18490
At3g10350	At1g44000
At4g29590	At1g67810
At4g24810	At1g26160
At5g50330	At1g45474
At4g13250	At1g65620
At1g54310	At1g01250
At5g21920	At1g03680
At5g20140	At1g01370
At3g60800	At1g76760
At1g71480	At1g68730
At5g36120	At1g42960
At3g24190	At1g43560
At1g78620	At1g52220
At1g12250	At1g77750
At3g26070	At1g10960
At3g26080	At1g60950
At5g60750	At1g15850
At5g35220	At1g54630
At3g17040	At1g54580
At4g25080	At1g26945
At1g09130	At1g74500
At3g51820	At1g43310
At1g54500	At4g24450
At4g14210	At4g24860
At4g04850	At4g32410
At3g19720	At2g21380
At2g26540	At4g39050
At4g31780	At2g37420
At4g35440	At4g08630
At1g53240	At4g25070
At3g15020	At4g34440
At3g52200	At2g26920
At5g66990	At2g37980
At2g37970	At2g18470
At4g11570	At4g22030
At5g03880	At2g02070
At2g18950	At2g38910
At5g53490	At2g31500
At5g19850	At2g29680
At1g13820	At4g32520
At1g22850	At2g21590
At2g44920	At4g39210
At3g11560	At2g38470
At5g06220	At4g37930
At4g13590	At2g02080
At2g27290	At2g19860
At3g07670	At4g29130
At1g04620	At4g22910
At1g25290	At4g11920
At1g19690	At2g33610
At1g15140	At4g03415
At2g38780	At2g28800
At1g76060	At2g34650
At5g47010	At2g27820
At5g41380	At4g25990
At4g17040	At4g29100
At3g63520	At4g02670
At3g11670	At4g04480
At2g21340	At2g25620
At2g40100	At2g33880
At2g30570	At4g26530
At4g28660	At2g44810
At4g37200	At2g43950
At3g63140	At4g24770
At1g64150	At2g24060
At3g50685	At2g22870
At3g50690	At2g37220
At2g23370	At4g30690
At2g21385	At2g24490
At2g35610	At2g33270
At5g47430	At4g39610
At4g17410	At2g40300
At4g24090	At2g21990
At5g67370	At4g34120
At5g27290	At4g36910
At1g44920	At4g11600
At5g48370	At4g00220
At2g30720	At4g27990
At1g59990	At2g41410
At1g03905	At4g18610
At5g44110	At4g03520
At3g06730	At4g13200
At5g38360	At4g35770
At4g26160	At4g16750
At4g31530	At4g36040
At2g35800	At4g34590
At5g02250	At4g34290
At3g51520	At2g14880
At1g28370	At4g25050
At3g05625	At2g06520
At5g62740	At4g17310
At1g69840	At4g10265
At3g01290	At2g32190
At4g15180	At3g14570
At1g26761	At3g61780
At2g21860	At3g12020
At5g05200	At3g48870
At4g00030	At3g54870
At1g30680	At3g45140
At3g02380	At3g18810
At1g34000	At3g07700
At1g76340	At3g19830
At5g19980	At3g10420
At1g55480	At3g10660
At1g66670	At3g55150
At1g68830	At3g01085
At3g09740	At3g50530
At4g03550	At3g19100
At4g04970	At3g05050
At3g52850	At3g27580
At2g14720	At3g24220
At2g14740	At3g12690
At2g30290	At3g23920
At5g42390	At3g47450
At5g22620	At3g02810
At5g23240	At3g53130
At2g04700	At3g29180
At5g13510	At3g01015
At4g38800	At3g50700
At3g53090	At3g44610
At3g51870	At3g54320
At5g46420	At3g26940
At5g54290	At3g17800
At5g08650	At3g44720
At1g80770	At3g14930
At1g04850	At3g09830
At4g22830	At3g62260
At1g51110	At3g07630
At4g32590	At3g51470
At3g02410	At3g05640
At5g15860	At3g52930
At4g35450	At3g53460
At2g17390	At3g48750
At2g34460	At3g03760
At4g15520	At3g56090
At5g05210	At3g60490
At1g07010	At3g11050
At4g30720	At3g10190
At1g26760	At3g50770
At4g10300	At3g04510
At3g06980	At3g27840
At1g49820	At3g27830
At4g13850	At3g27850
At1g48310	At3g02730
At4g01995	At3g11090
At5g19050	At3g44020
At1g10760	At3g17609
At4g30580	At3g23230
At4g00850	At3g05020
At1g04750	At3g47650
At1g04760	At3g28857
At2g32670	At3g47710
At2g33120	At3g15352
At2g38620	At5g53460
At3g54180	At5g04140
At5g08450	At5g06670
At1g16870	At5g04810
At5g61670	At5g50920
At4g01883	At5g42270
At1g28140	At5g35570
At3g01920	At5g39420
At2g42880	At5g01100
At3g03940	At5g40200
At5g18190	At5g35170
At5g56730	At5g47750
At2g40860	At5g23700
At2g46170	At5g57390
At1g64090	At5g12480
At4g11220	At5g25510
At4g23630	At5g40030
At5g41600	At5g55910
At5g08340	At5g15510
At5g23330	At5g44160
At3g24050	At5g64090
At2g46910	At5g25380
At3g21140	At5g57180
At2g28605	At5g17640
At5g40500	At5g22630
At2g47970	At5g03320
At3g63000	At5g51760
At2g15290	At5g19000
At3g47390	At5g10100
At4g37270	At5g57970
At1g50320	At5g65670
At3g52880	At5g23530
At1g02280	At5g39220
At3g04030	At5g62910
At5g18240	At5g45980
At1g51650	At5g42860
At1g53540	At5g11480
At3g46230	At5g07950
At5g59720	At5g20190
At5g20040	At5g28150
At2g39930	At5g50250
At5g04360	At5g37720
At5g57040	At5g47840
At2g34860	At5g16390
At4g18810	At5g06990
At1g14270	At5g47110
At1g16320	At5g15530
At1g53120	At5g01600
At3g02290	At5g61440
At1g65070	At5g59950
At1g18480	At5g51990
At4g09730	At5g19830
At5g51180	At5g41960
At1g10040	At5g63090
At1g21000	At5g16400
At1g76590	At5g58500
At3g08640	At5g02020
At3g08630	At5g10000
At5g22790	At5g27200
At3g01180	At5g66040
At5g45040	At5g15160
At1g12230	At5g39860
At1g76080
At1g61520
At1g55670
At5g17523
At4g33950
At1g53650
At5g26570
At1g08980
At2g35500
At3g07770
At3g27080
At3g27730
At5g57850
At5g16620
At2g33540
At1g73110
At1g67740
At1g44575
At5g44520
At4g14690
At3g46740
At5g46110
At3g25110
At4g13050
At4g20380
At5g64290
At1g31330
At3g56940
At5g64860
At1g49380
At1g69390
At4g33520
At1g30380
At3g20320
At3g12270
At3g05480
At1g26940
At5g11450
At3g10060
At3g15520
At1g20810
At4g15510
At4g14890
At3g60370
At1g19970
At1g75760
At2g21190
At4g38790
At1g74070
At4g31040
At2g20920
At5g04440
At2g17972
At3g58800
At1g64680
At5g11960
At1g19360
At1g75110
At5g05360
At5g39790
At1g08030
At1g07040
At1g50020
At5g55570
At2g17240
At1g74530
At1g28100
At5g13500
At4g29520
At1g62780
At1g42430
At1g77090
At3g57280
At5g24690
At3g10405
At5g27710
At1g49975
At4g04330
At5g48790
At4g24610
At1g65230
At1g05385
At5g44650
At4g25660
At4g25680
At4g11911
At4g26410
At5g13940
At1g67600
At1g24350
At4g29400
At3g61770
At3g51140
At1g78915
At5g58250
At1g08530
At5g39660
At2g38270
At1g68410
At3g53220
At3g23700
At5g17060
At3g03120
At5g10630
At5g01930
At3g07400
At5g64150
At1g52510
At4g20460
At3g01660
At1g21070
At1g76670
At5g42420
At2g26660
At5g20150
At4g35360
At2g17320
At2g17340
At5g20380
At5g50550
At2g03670
At5g51110
At5g44590
At5g44600
At4g17760
At5g43560
At5g27280
At5g53570
At5g45360
At1g50575
At5g19940
At4g09620
At3g59780
At2g31140
At1g66170
At5g24650
At3g49560
At1g67270
At1g69210
At2g42770
At1g71500
At1g22700
At3g25470
At1g19600
At5g35100
At5g04910
At1g76450
At2g05310
At4g13500
At2g31040
At1g59840
At3g61680
At3g14110
At1g66240
At1g32050
At4g00026
At1g69830
At3g44890
At4g35080
At2g16800
At5g46390
At5g52110
At5g42480
At4g32260
At1g52530
At1g19025
At3g54010
At5g02120
At1g64530
At5g61880
At3g59280
At5g66130
At2g47450
At5g51220
At5g57160
At3g06310
At5g18800
At2g19570
At5g04620
At4g24190
At5g28210
At3g09100
At5g01290
At2g30970
At4g11120
At5g25752
At3g24315
At1g12770
At2g21530
At5g21990
At4g22140
At4g04260
At4g28020
At3g06170
At1g16180
At5g17240
At5g42320
At4g34150
At3g17470
At5g19430
At1g24610
At4g02600
At2g44020
At1g02870
At1g26220
At3g02690
At5g14100
At4g01940
At5g19620
At3g26085
At2g35840
At1g51420
At3g52340
At4g35250
At3g24800
At1g15870
At1g80720
At5g27600
At3g05970
At5g58870
At3g47060
At5g47140
At3g01540
At1g50000
At4g37750
At3g43240
At2g27470
At1g47750
At1g17520
At5g19360
At5g21010
At3g23080
At4g14500
At2g25900
At5g23060
At2g32520
At1g27330
At1g27350
At1g31870
At4g00231
At1g72040
At1g16240
At1g79590
At2g27100
At3g01640
At5g14470
At5g09380
At1g30130
At4g34730
At5g13830
At3g52155
At5g03760
At5g22740
At1g60230
At4g23620
At2g26590
At4g13870
At3g18524
At4g00690
At4g15880
At5g56900
At5g26110
At1g04635
At5g47690
At5g63440
At4g01150
At4g15790
At2g35810
At2g35820
At2g35830
At3g56330
At5g44450
At2g39650
At5g65950
At4g28030
At3g27530
At1g78995
At1g24310
At5g64816
At3g51510
At3g07560
At3g04560
At5g41950
At1g36320
At1g27385
At1g34630
At4g38225
At5g25265
At5g57370
At2g25310
At4g32130
At3g59630
At3g02790
At5g16470
At2g27280
At2g27285
At3g07790
At3g56690
At1g53800
At1g21780

## Sheet: Shared At Loci
Found in GreenCut2, UCLUST50, and USEARCH 4040	Only in GreenCut2 and USEARCH4040	Only in GreenCut2 and UCLUST 50%	Only in USEARCH4040 and UCLUST50
At1g14030	At4g05390	At5g24000	At3g17850
At1g32500	At1g30510	At5g62840	At1g80070
At2g40490	At5g64940	At2g46100	At1g06490
At1g02560	At1g57770	At3g19900	At2g13680
At5g52970	At5g18660	At4g15530	At3g59100
At4g11960	At1g10700	At5g17520	At5g15250
At4g22890	At4g32320	At1g11800	At2g25320
At2g27680	At1g08380	At1g65280	At2g25330
At3g48420	At4g17090	At5g13390	At1g21730
At1g03600	At5g28750		At3g44050
At4g35760	At3g54890		At1g15210
At3g13490	At1g76570		At1g15520
At4g03280	At4g17600		At1g59870
At4g27440	At5g19220		At1g66950
At5g54190	At1g67090		At3g16340
At4g32770	At5g38420		At4g25540
At5g33320	At5g38430		At3g23670
At2g41040	At2g27510		At4g14150
At3g47470	At5g17630		At1g02890
At2g43710	At5g38410		At4g02480
At3g59400	At5g04740		At2g41830
At4g33630	At3g07430		At5g21080
At1g67080	At5g52440		At5g11490
At5g17170	At3g03740		At1g02730
At4g10340	At3g43700		At2g33100
At3g03890			At3g03050
At3g01060			At4g38190
At1g06950			At5g16910
At1g32550			At3g07100
At4g05180			At5g12150
At4g21280			At5g19390
At1g18170			At2g30390
At2g32040			At3g20150
At2g46220			At1g23730
At1g54780			At1g70410
At2g39730			At3g01500
At4g23100			At5g14740
At5g46290			At2g17220
At1g49970			At4g35600
At5g11260			At5g26030
At5g58330			At1g13460
At3g16140			At3g09880
At1g52230			At3g26020
At5g48300			At3g54930
At1g03130			At2g01140
At4g02770			At2g21330
At2g30950			At4g38970
At1g06430			At4g29060
At4g12800			At2g28620
At2g20260			At3g45850
At1g44446			At1g09840
At1g06680			At1g57870
At2g30790			At1g79560
At3g56650			At4g29750
At4g24930			At3g29320
At5g08540			At3g08960
At1g50900			At2g25140
At4g22920			At5g15450
At4g11910			At4g14330
At3g56040			At1g01950
At5g27560			At1g12430
At2g04360			At1g61800
At1g76100			At4g03950
At5g55220			At5g54800
At3g15190			At1g08720
At2g33450			At1g06410
At3g55330			At1g68020
At1g12410			At4g17770
At3g44340			At1g18370
At4g32640			At1g09600
			At1g53050
			At5g44290
			At3g04260
			At3g22690
			At1g63700
			At2g14120
			At4g33650
			At1g67930
			At2g29650
			At4g00370
			At5g20930
			At5g13030
			At5g66090
			At5g02830
			At3g18390
			At2g18940
			At1g13170
			At1g77730
			At2g31020
			At4g08180
			At3g21650
			At4g15415
			At1g14970
			At1g35510
			At2g01480
			At1g52420
			At3g15940
			At2g20020
			At1g32380
			At2g35390
			At2g44530
			At1g69526
			At3g09650
			At3g22960
			At2g06050
			At2g42520
			At3g58510
			At3g58570
			At5g01830
			At3g19420
			At5g13550
			At2g17890
			At4g36070
			At5g66210
			At1g26230
			At1g55490
			At3g13470
			At5g56500
			At1g78090
			At4g12430
			At4g22590
			At5g51460
			At5g65140
			At1g24280
			At5g13110
			At5g35790
			At3g11590
			At5g48130
			At1g48860
			At2g45300
			At5g03940
			At3g48560
			At3g24550
			At1g79700
			At1g49890
			At3g19570
			At1g30100
			At1g78390
			At3g14440
			At4g18350
			At1g23190
			At5g51820
			At1g12330
			At3g55400
			At2g44990
			At4g18570
			At4g02930
			At4g20360
			At3g27740
			At1g32900
			At5g01330
			At3g14900
			At3g55800
			At2g21280
			At1g12000
			At4g26900
			At5g48730
			At2g36990
			At2g28000
			At5g18820
			At1g07280
			At2g29670
			At3g47080
			At1g38065
			At1g38131
			At1g51190
			At5g13260
			At1g02910
			At2g36500
			At3g52950
			At5g50530
			At5g50640
			At5g63490
			At4g04770
			At5g44316
			At2g26100
			At3g20410
			At4g21940
			At4g23650
			At1g45050
			At1g75440
			At5g42990
			At4g16820
			At1g61590
			At2g05940
			At3g55450
			At5g01020
			At1g47670
			At1g11840
			At1g67280
			At3g63130
			At5g19320
			At5g42650
			At1g06800
			At1g51440
			At2g30550
			At5g13840
			At3g02750
			At5g36250
			At2g37680
			At2g26700
			At3g46780
			At5g24120
			At1g13960
			At1g76370
			At3g24790
			At5g02800
			At5g18610
			At2g01940
			At1g13440
			At1g16300
			At1g79530
			At4g16490
			At4g33030
			At2g38630
			At3g54190
			At1g24530
			At1g74470
			At1g15980
			At5g47070
			At1g15730
			At1g80480
			At3g11170
			At5g05580
			At1g62640
			At1g43800
			At3g02610
			At3g02620
			At3g02630
			At5g16230
			At5g16240
			At1g12900
			At1g42970
			At3g26650
			At1g45688
			At1g48850
			At2g45770
			At1g07570
			At1g14370
			At2g02800
			At2g28930
			At2g39660
			At5g02290
			At3g11630
			At5g06290
			At1g66200
			At5g35630
			At5g12040
			At4g18480
			At5g45930
			At3g12710
			At5g44680
			At3g11410
			At5g59220
			At1g08510
			At1g13260
			At1g25560
			At1g68840
			At3g25730
			At1g30120
			At2g34590
			At3g01550
			At3g47520
			At5g09660
			At1g75330
			At5g52100
			At1g13270
			At3g25740
			At4g37040
			At1g24360
			At1g63610
			At1g03630
			At1g51660
			At3g21220
			At3g63490
			At3g28460
			At5g17710
			At4g36530
			At2g28760
			At3g46440
			At5g59290
			At1g19150
			At3g61470
			At5g28450
			At1g20020
			At5g66190
			At4g05060
			At4g21450
			At5g54110
			At1g60000
			At3g09210
			At4g02800
			At2g42380
			At3g58120
			At5g32440
			At4g25700
			At5g52570
			At5g61410
			At4g09650
			At2g21940
			At3g62030
			At5g13120
			At1g29910
			At1g29920
			At1g29930
			At2g05070
			At2g05100
			At2g34420
			At2g34430
			At3g27690
			At5g54270
			At2g25080
			At4g31870
			At3g25920
			At1g15820
			At1g35680
			At2g39470
			At2g36680
			At3g53120
			At4g17560
			At5g47190
			At5g20720
			At1g13280
			At3g25760
			At3g25770
			At3g25780
			At5g19140
			At3g43980
			At3g44010
			At4g33865
			At2g24020
			At4g30620
			At4g25910
			At5g49940
			At3g15360
			At2g22230
			At5g10160
			At1g07900
			At2g28500
			At2g25605
			At1g09200
			At1g13370
			At1g19890
			At1g75600
			At3g27360
			At4g40030
			At4g40040
			At5g10390
			At5g10400
			At5g10980
			At5g65350
			At5g65360
			At3g26060
			At3g13120
			At2g46820
			At1g68490
			At4g28750
			At4g02725
			At5g52960
			At1g20340
			At5g14320
			At1g08880
			At1g54690
			At2g38810
			At3g02900
			At5g16660
			At1g19510
			At1g79040
			At2g38140

## Sheet: 70 Conserved Seqs GO term info
GO term information for 70 sequences found in GreenCut2, USEARCH4040, and UCLUST50
Locus	GO term
At1g14030	GO:0000003
At1g32500	GO:0000003
At3g13490	GO:0000003
At5g48300	GO:0000003
At5g52970	GO:0000003
At1g06430	GO:0000166
At2g30950	GO:0000166
At4g23100	GO:0000166
At2g39730	GO:0000166
At4g27440	GO:0000166
At3g13490	GO:0000166
At3g03890	GO:0000166
At5g48300	GO:0000166
At5g58330	GO:0000166
At5g54190	GO:0000166
At1g32550	GO:0003674
At1g76100	GO:0003674
At4g03280	GO:0003674
At3g13490	GO:0003676
At4g33630	GO:0003677
At5g11260	GO:0003677
At5g11260	GO:0003700
At1g06680	GO:0003723
At2g30790	GO:0003723
At3g15190	GO:0003723
At1g44446	GO:0003824
At1g06680	GO:0003824
At1g18170	GO:0003824
At4g23100	GO:0003824
At4g32770	GO:0003824
At4g27440	GO:0003824
At2g43710	GO:0003824
At2g40490	GO:0003824
At2g27680	GO:0003824
At4g35760	GO:0003824
At4g03280	GO:0003824
At2g30790	GO:0003824
At3g13490	GO:0003824
At3g03890	GO:0003824
At5g55220	GO:0003824
At5g58330	GO:0003824
At5g54190	GO:0003824
At4g33630	GO:0004518
At2g33450	GO:0005198
At3g15190	GO:0005198
At1g32500	GO:0005215
At4g32640	GO:0005215
At2g32040	GO:0005215
At4g03280	GO:0005215
At3g44340	GO:0005215
At5g33320	GO:0005215
At1g06430	GO:0005488
At1g44446	GO:0005488
At1g06680	GO:0005488
At1g18170	GO:0005488
At1g32550	GO:0005488
At1g76100	GO:0005488
At4g32640	GO:0005488
At2g30950	GO:0005488
At2g43710	GO:0005488
At4g10340	GO:0005488
At4g05180	GO:0005488
At4g03280	GO:0005488
At4g21280	GO:0005488
At2g30790	GO:0005488
At3g44340	GO:0005488
At3g13490	GO:0005488
At3g59400	GO:0005488
At3g56650	GO:0005488
At3g47470	GO:0005488
At3g55330	GO:0005488
At5g17170	GO:0005488
At5g11260	GO:0005488
At1g06950	GO:0005515
At1g14030	GO:0005515
At1g32500	GO:0005515
At1g50900	GO:0005515
At4g32640	GO:0005515
At4g33630	GO:0005515
At4g11910	GO:0005515
At4g22920	GO:0005515
At4g03280	GO:0005515
At4g02770	GO:0005515
At3g44340	GO:0005515
At3g59400	GO:0005515
At3g56650	GO:0005515
At5g11260	GO:0005515
At1g06950	GO:0005575
At1g06680	GO:0005576
At2g39730	GO:0005576
At4g05180	GO:0005576
At4g21280	GO:0005576
At2g30790	GO:0005576
At3g03890	GO:0005576
At5g48300	GO:0005576
At5g58330	GO:0005576
At2g39730	GO:0005618
At2g27680	GO:0005618
At3g47470	GO:0005622
At2g39730	GO:0005634
At5g11260	GO:0005654
At4g23100	GO:0005737
At5g48300	GO:0005737
At5g46290	GO:0005737
At1g06430	GO:0005739
At2g30950	GO:0005739
At3g13490	GO:0005739
At5g58330	GO:0005739
At5g33320	GO:0005739
At4g32640	GO:0005794
At3g44340	GO:0005794
At4g32640	GO:0005829
At3g44340	GO:0005829
At2g33450	GO:0005840
At3g15190	GO:0005840
At4g03280	GO:0005886
At1g06430	GO:0005975
At1g14030	GO:0005975
At1g02560	GO:0005975
At1g54780	GO:0005975
At1g32550	GO:0005975
At1g50900	GO:0005975
At1g76100	GO:0005975
At2g30950	GO:0005975
At4g23100	GO:0005975
At4g32770	GO:0005975
At4g27440	GO:0005975
At2g43710	GO:0005975
At2g27680	GO:0005975
At4g35760	GO:0005975
At4g22890	GO:0005975
At4g11960	GO:0005975
At4g03280	GO:0005975
At4g24930	GO:0005975
At2g33450	GO:0005975
At3g01060	GO:0005975
At3g48420	GO:0005975
At3g59400	GO:0005975
At3g55330	GO:0005975
At5g55220	GO:0005975
At5g48300	GO:0005975
At5g58330	GO:0005975
At5g54190	GO:0005975
At5g27560	GO:0005975
At5g17170	GO:0005975
At5g52970	GO:0005975
At1g06430	GO:0006091
At1g32500	GO:0006091
At1g54780	GO:0006091
At1g12410	GO:0006091
At1g06680	GO:0006091
At1g03130	GO:0006091
At1g32550	GO:0006091
At1g03600	GO:0006091
At1g76100	GO:0006091
At1g52230	GO:0006091
At2g30950	GO:0006091
At4g23100	GO:0006091
At2g39730	GO:0006091
At4g27440	GO:0006091
At4g35760	GO:0006091
At4g22890	GO:0006091
At4g11960	GO:0006091
At4g10340	GO:0006091
At4g05180	GO:0006091
At4g03280	GO:0006091
At4g21280	GO:0006091
At4g12800	GO:0006091
At4g02770	GO:0006091
At2g20260	GO:0006091
At2g30790	GO:0006091
At3g48420	GO:0006091
At3g59400	GO:0006091
At3g47470	GO:0006091
At3g55330	GO:0006091
At3g16140	GO:0006091
At5g48300	GO:0006091
At5g58330	GO:0006091
At5g54190	GO:0006091
At5g27560	GO:0006091
At5g17170	GO:0006091
At1g06430	GO:0006139
At1g14030	GO:0006139
At1g32500	GO:0006139
At1g54780	GO:0006139
At1g12410	GO:0006139
At1g06680	GO:0006139
At1g03130	GO:0006139
At1g32550	GO:0006139
At1g50900	GO:0006139
At1g03600	GO:0006139
At1g76100	GO:0006139
At1g52230	GO:0006139
At2g30950	GO:0006139
At2g43710	GO:0006139
At2g27680	GO:0006139
At4g35760	GO:0006139
At4g22890	GO:0006139
At4g11960	GO:0006139
At4g10340	GO:0006139
At4g05180	GO:0006139
At4g03280	GO:0006139
At4g21280	GO:0006139
At4g12800	GO:0006139
At4g02770	GO:0006139
At2g20260	GO:0006139
At2g30790	GO:0006139
At3g13490	GO:0006139
At3g48420	GO:0006139
At3g59400	GO:0006139
At3g55330	GO:0006139
At3g15190	GO:0006139
At3g16140	GO:0006139
At5g55220	GO:0006139
At5g48300	GO:0006139
At5g58330	GO:0006139
At5g17170	GO:0006139
At5g52970	GO:0006139
At4g33630	GO:0006259
At1g06430	GO:0006350
At1g44446	GO:0006350
At1g32500	GO:0006350
At1g12410	GO:0006350
At1g76100	GO:0006350
At2g30950	GO:0006350
At4g27440	GO:0006350
At2g27680	GO:0006350
At3g59400	GO:0006350
At5g54190	GO:0006350
At5g11260	GO:0006350
At1g76100	GO:0006412
At2g33450	GO:0006412
At3g13490	GO:0006412
At3g15190	GO:0006412
At1g06430	GO:0006464
At1g14030	GO:0006464
At1g32500	GO:0006464
At1g54780	GO:0006464
At1g12410	GO:0006464
At1g18170	GO:0006464
At1g03130	GO:0006464
At1g03600	GO:0006464
At1g76100	GO:0006464
At1g52230	GO:0006464
At2g30950	GO:0006464
At4g22890	GO:0006464
At4g11960	GO:0006464
At4g05180	GO:0006464
At4g21280	GO:0006464
At4g02770	GO:0006464
At3g47470	GO:0006464
At3g16140	GO:0006464
At5g11260	GO:0006464
At1g44446	GO:0006519
At1g14030	GO:0006519
At1g32500	GO:0006519
At1g54780	GO:0006519
At1g06680	GO:0006519
At1g03130	GO:0006519
At1g76100	GO:0006519
At1g52230	GO:0006519
At4g23100	GO:0006519
At4g27440	GO:0006519
At2g43710	GO:0006519
At2g27680	GO:0006519
At4g10340	GO:0006519
At4g02770	GO:0006519
At2g20260	GO:0006519
At2g30790	GO:0006519
At3g13490	GO:0006519
At3g59400	GO:0006519
At3g47470	GO:0006519
At3g16140	GO:0006519
At5g54190	GO:0006519
At5g11260	GO:0006519
At1g14030	GO:0006629
At1g54780	GO:0006629
At1g67080	GO:0006629
At1g32550	GO:0006629
At1g50900	GO:0006629
At4g32770	GO:0006629
At2g43710	GO:0006629
At2g27680	GO:0006629
At4g35760	GO:0006629
At2g33450	GO:0006629
At3g56040	GO:0006629
At3g48420	GO:0006629
At3g59400	GO:0006629
At5g55220	GO:0006629
At5g48300	GO:0006629
At5g46290	GO:0006629
At5g52970	GO:0006629
At1g06950	GO:0006810
At1g32500	GO:0006810
At1g06680	GO:0006810
At1g03130	GO:0006810
At1g50900	GO:0006810
At1g76100	GO:0006810
At4g32640	GO:0006810
At2g32040	GO:0006810
At4g32770	GO:0006810
At2g39730	GO:0006810
At2g43710	GO:0006810
At4g10340	GO:0006810
At4g05180	GO:0006810
At4g03280	GO:0006810
At4g21280	GO:0006810
At4g12800	GO:0006810
At4g02770	GO:0006810
At2g20260	GO:0006810
At2g30790	GO:0006810
At3g44340	GO:0006810
At3g47470	GO:0006810
At5g55220	GO:0006810
At5g48300	GO:0006810
At5g33320	GO:0006810
At5g11260	GO:0006810
At1g06430	GO:0006950
At1g06680	GO:0006950
At1g67080	GO:0006950
At1g76100	GO:0006950
At4g32640	GO:0006950
At2g30950	GO:0006950
At4g33630	GO:0006950
At4g23100	GO:0006950
At4g32770	GO:0006950
At2g39730	GO:0006950
At2g43710	GO:0006950
At4g22890	GO:0006950
At4g11960	GO:0006950
At2g46220	GO:0006950
At4g03280	GO:0006950
At2g30790	GO:0006950
At3g44340	GO:0006950
At3g56040	GO:0006950
At3g56040	GO:0007154
At1g06680	GO:0007165
At2g39730	GO:0007165
At4g03280	GO:0007165
At2g30790	GO:0007165
At3g59400	GO:0007165
At5g11260	GO:0007165
At1g44446	GO:0007275
At1g76100	GO:0007275
At4g27440	GO:0007275
At3g59400	GO:0007275
At3g56650	GO:0007275
At5g54190	GO:0007275
At5g11260	GO:0007275
At1g06680	GO:0008150
At1g76100	GO:0008150
At4g33630	GO:0008150
At4g23100	GO:0008150
At2g39730	GO:0008150
At4g22890	GO:0008150
At4g11960	GO:0008150
At4g10340	GO:0008150
At4g05180	GO:0008150
At4g03280	GO:0008150
At4g21280	GO:0008150
At2g30790	GO:0008150
At3g01060	GO:0008150
At3g59400	GO:0008150
At3g55330	GO:0008150
At5g48300	GO:0008150
At5g58330	GO:0008150
At5g27560	GO:0008150
At5g11260	GO:0008150
At1g44446	GO:0008152
At1g54780	GO:0008152
At1g06680	GO:0008152
At1g67080	GO:0008152
At4g32770	GO:0008152
At2g39730	GO:0008152
At4g27440	GO:0008152
At2g43710	GO:0008152
At2g27680	GO:0008152
At2g41040	GO:0008152
At4g03280	GO:0008152
At2g30790	GO:0008152
At3g03890	GO:0008152
At5g58330	GO:0008152
At5g54190	GO:0008152
At1g06680	GO:0008219
At2g39730	GO:0008219
At4g03280	GO:0008219
At2g30790	GO:0008219
At1g06430	GO:0009056
At1g32500	GO:0009056
At1g49970	GO:0009056
At1g02560	GO:0009056
At1g12410	GO:0009056
At1g67080	GO:0009056
At1g32550	GO:0009056
At1g50900	GO:0009056
At1g76100	GO:0009056
At2g30950	GO:0009056
At4g23100	GO:0009056
At2g43710	GO:0009056
At2g27680	GO:0009056
At4g35760	GO:0009056
At4g22890	GO:0009056
At4g11960	GO:0009056
At4g11910	GO:0009056
At4g22920	GO:0009056
At4g03280	GO:0009056
At2g33450	GO:0009056
At3g48420	GO:0009056
At3g59400	GO:0009056
At3g55330	GO:0009056
At5g48300	GO:0009056
At5g58330	GO:0009056
At5g17170	GO:0009056
At5g52970	GO:0009056
At1g44446	GO:0009058
At1g14030	GO:0009058
At1g32500	GO:0009058
At1g02560	GO:0009058
At1g54780	GO:0009058
At1g06680	GO:0009058
At1g67080	GO:0009058
At1g03130	GO:0009058
At1g32550	GO:0009058
At1g50900	GO:0009058
At1g76100	GO:0009058
At1g52230	GO:0009058
At4g23100	GO:0009058
At4g32770	GO:0009058
At2g39730	GO:0009058
At4g27440	GO:0009058
At2g43710	GO:0009058
At2g40490	GO:0009058
At2g27680	GO:0009058
At4g35760	GO:0009058
At4g22890	GO:0009058
At4g11960	GO:0009058
At4g10340	GO:0009058
At4g05180	GO:0009058
At4g03280	GO:0009058
At4g24930	GO:0009058
At4g21280	GO:0009058
At4g02770	GO:0009058
At2g20260	GO:0009058
At2g33450	GO:0009058
At2g30790	GO:0009058
At3g56040	GO:0009058
At3g13490	GO:0009058
At3g01060	GO:0009058
At3g03890	GO:0009058
At3g48420	GO:0009058
At3g59400	GO:0009058
At3g47470	GO:0009058
At3g15190	GO:0009058
At3g16140	GO:0009058
At5g55220	GO:0009058
At5g48300	GO:0009058
At5g46290	GO:0009058
At5g58330	GO:0009058
At5g54190	GO:0009058
At5g27560	GO:0009058
At5g52970	GO:0009058
At1g06950	GO:0009536
At1g06430	GO:0009536
At1g44446	GO:0009536
At1g14030	GO:0009536
At1g32500	GO:0009536
At1g49970	GO:0009536
At1g02560	GO:0009536
At1g54780	GO:0009536
At1g12410	GO:0009536
At1g06680	GO:0009536
At1g18170	GO:0009536
At1g67080	GO:0009536
At1g03130	GO:0009536
At1g32550	GO:0009536
At1g50900	GO:0009536
At1g03600	GO:0009536
At1g76100	GO:0009536
At1g52230	GO:0009536
At2g30950	GO:0009536
At4g33630	GO:0009536
At2g32040	GO:0009536
At4g23100	GO:0009536
At4g32770	GO:0009536
At2g39730	GO:0009536
At4g27440	GO:0009536
At2g43710	GO:0009536
At2g40490	GO:0009536
At2g27680	GO:0009536
At4g35760	GO:0009536
At2g41040	GO:0009536
At4g22890	GO:0009536
At2g04360	GO:0009536
At4g11960	GO:0009536
At4g10340	GO:0009536
At4g11910	GO:0009536
At4g22920	GO:0009536
At2g46220	GO:0009536
At4g05180	GO:0009536
At4g03280	GO:0009536
At4g24930	GO:0009536
At4g21280	GO:0009536
At4g12800	GO:0009536
At4g02770	GO:0009536
At2g20260	GO:0009536
At2g33450	GO:0009536
At2g30790	GO:0009536
At3g56040	GO:0009536
At3g13490	GO:0009536
At3g01060	GO:0009536
At3g03890	GO:0009536
At3g48420	GO:0009536
At3g59400	GO:0009536
At3g56650	GO:0009536
At3g47470	GO:0009536
At3g55330	GO:0009536
At3g15190	GO:0009536
At3g16140	GO:0009536
At5g55220	GO:0009536
At5g48300	GO:0009536
At5g58330	GO:0009536
At5g33320	GO:0009536
At5g54190	GO:0009536
At5g08540	GO:0009536
At5g27560	GO:0009536
At5g17170	GO:0009536
At5g52970	GO:0009536
At1g06430	GO:0009579
At1g44446	GO:0009579
At1g49970	GO:0009579
At1g02560	GO:0009579
At1g54780	GO:0009579
At1g12410	GO:0009579
At1g06680	GO:0009579
At1g18170	GO:0009579
At1g67080	GO:0009579
At1g03130	GO:0009579
At1g03600	GO:0009579
At1g76100	GO:0009579
At1g52230	GO:0009579
At2g30950	GO:0009579
At4g33630	GO:0009579
At4g32770	GO:0009579
At2g39730	GO:0009579
At4g27440	GO:0009579
At2g43710	GO:0009579
At4g22890	GO:0009579
At4g11960	GO:0009579
At4g10340	GO:0009579
At4g05180	GO:0009579
At4g03280	GO:0009579
At4g24930	GO:0009579
At4g21280	GO:0009579
At4g12800	GO:0009579
At4g02770	GO:0009579
At2g20260	GO:0009579
At2g30790	GO:0009579
At3g56650	GO:0009579
At3g47470	GO:0009579
At3g55330	GO:0009579
At3g16140	GO:0009579
At5g58330	GO:0009579
At5g54190	GO:0009579
At5g08540	GO:0009579
At5g17170	GO:0009579
At5g52970	GO:0009579
At1g76100	GO:0009605
At5g11260	GO:0009605
At1g06680	GO:0009607
At4g23100	GO:0009607
At2g39730	GO:0009607
At2g43710	GO:0009607
At4g22890	GO:0009607
At4g11960	GO:0009607
At2g46220	GO:0009607
At4g03280	GO:0009607
At2g30790	GO:0009607
At1g06430	GO:0009628
At1g54780	GO:0009628
At1g06680	GO:0009628
At1g67080	GO:0009628
At1g76100	GO:0009628
At4g32640	GO:0009628
At2g30950	GO:0009628
At4g23100	GO:0009628
At4g32770	GO:0009628
At2g39730	GO:0009628
At2g43710	GO:0009628
At4g22890	GO:0009628
At4g11960	GO:0009628
At4g10340	GO:0009628
At4g05180	GO:0009628
At4g03280	GO:0009628
At4g21280	GO:0009628
At2g30790	GO:0009628
At3g44340	GO:0009628
At5g48300	GO:0009628
At5g17170	GO:0009628
At5g11260	GO:0009628
At1g44446	GO:0009653
At1g32550	GO:0009653
At1g76100	GO:0009653
At4g27440	GO:0009653
At4g24930	GO:0009653
At3g48420	GO:0009653
At3g59400	GO:0009653
At3g56650	GO:0009653
At3g55330	GO:0009653
At5g55220	GO:0009653
At5g54190	GO:0009653
At1g06680	GO:0009719
At4g23100	GO:0009719
At2g39730	GO:0009719
At4g27440	GO:0009719
At4g03280	GO:0009719
At2g30790	GO:0009719
At5g54190	GO:0009719
At5g11260	GO:0009719
At1g14030	GO:0009790
At1g32500	GO:0009790
At3g13490	GO:0009790
At5g48300	GO:0009790
At5g52970	GO:0009790
At1g14030	GO:0009791
At1g32500	GO:0009791
At1g32550	GO:0009791
At4g24930	GO:0009791
At3g13490	GO:0009791
At3g48420	GO:0009791
At3g55330	GO:0009791
At5g55220	GO:0009791
At5g48300	GO:0009791
At5g52970	GO:0009791
At5g11260	GO:0009791
At1g32500	GO:0009908
At4g23100	GO:0009908
At3g13490	GO:0009908
At5g48300	GO:0009908
At5g52970	GO:0009908
At5g11260	GO:0009908
At1g06950	GO:0009987
At1g06430	GO:0009987
At1g44446	GO:0009987
At1g14030	GO:0009987
At1g32500	GO:0009987
At1g02560	GO:0009987
At1g54780	GO:0009987
At1g12410	GO:0009987
At1g06680	GO:0009987
At1g18170	GO:0009987
At1g67080	GO:0009987
At1g03130	GO:0009987
At1g32550	GO:0009987
At1g50900	GO:0009987
At1g03600	GO:0009987
At1g76100	GO:0009987
At1g52230	GO:0009987
At4g32640	GO:0009987
At2g30950	GO:0009987
At4g23100	GO:0009987
At4g32770	GO:0009987
At2g39730	GO:0009987
At4g27440	GO:0009987
At2g43710	GO:0009987
At2g40490	GO:0009987
At2g27680	GO:0009987
At4g35760	GO:0009987
At2g41040	GO:0009987
At4g22890	GO:0009987
At4g11960	GO:0009987
At4g11910	GO:0009987
At4g22920	GO:0009987
At4g05180	GO:0009987
At4g03280	GO:0009987
At4g24930	GO:0009987
At4g21280	GO:0009987
At4g12800	GO:0009987
At4g02770	GO:0009987
At2g20260	GO:0009987
At2g33450	GO:0009987
At2g30790	GO:0009987
At3g44340	GO:0009987
At3g56040	GO:0009987
At3g13490	GO:0009987
At3g01060	GO:0009987
At3g03890	GO:0009987
At3g48420	GO:0009987
At3g59400	GO:0009987
At3g56650	GO:0009987
At3g55330	GO:0009987
At3g15190	GO:0009987
At3g16140	GO:0009987
At5g55220	GO:0009987
At5g48300	GO:0009987
At5g46290	GO:0009987
At5g58330	GO:0009987
At5g54190	GO:0009987
At5g27560	GO:0009987
At5g17170	GO:0009987
At5g52970	GO:0009987
At5g11260	GO:0009987
At3g56040	GO:0009991
At1g06430	GO:0015979
At1g32500	GO:0015979
At1g54780	GO:0015979
At1g12410	GO:0015979
At1g06680	GO:0015979
At1g03130	GO:0015979
At1g03600	GO:0015979
At1g76100	GO:0015979
At1g52230	GO:0015979
At2g30950	GO:0015979
At2g39730	GO:0015979
At4g27440	GO:0015979
At4g35760	GO:0015979
At4g22890	GO:0015979
At4g11960	GO:0015979
At4g10340	GO:0015979
At4g05180	GO:0015979
At4g03280	GO:0015979
At4g21280	GO:0015979
At4g12800	GO:0015979
At4g02770	GO:0015979
At2g20260	GO:0015979
At2g30790	GO:0015979
At3g48420	GO:0015979
At3g59400	GO:0015979
At3g56650	GO:0015979
At3g47470	GO:0015979
At3g55330	GO:0015979
At3g16140	GO:0015979
At5g58330	GO:0015979
At5g54190	GO:0015979
At5g27560	GO:0015979
At5g17170	GO:0015979
At1g06950	GO:0016020
At1g06430	GO:0016020
At1g44446	GO:0016020
At1g54780	GO:0016020
At1g06680	GO:0016020
At1g18170	GO:0016020
At1g67080	GO:0016020
At1g03130	GO:0016020
At1g03600	GO:0016020
At1g76100	GO:0016020
At1g52230	GO:0016020
At4g32640	GO:0016020
At2g30950	GO:0016020
At4g33630	GO:0016020
At2g32040	GO:0016020
At4g32770	GO:0016020
At2g39730	GO:0016020
At4g27440	GO:0016020
At4g35760	GO:0016020
At4g22890	GO:0016020
At4g11960	GO:0016020
At4g10340	GO:0016020
At4g05180	GO:0016020
At4g03280	GO:0016020
At4g21280	GO:0016020
At4g12800	GO:0016020
At4g02770	GO:0016020
At2g20260	GO:0016020
At2g33450	GO:0016020
At2g30790	GO:0016020
At3g44340	GO:0016020
At3g56650	GO:0016020
At3g47470	GO:0016020
At3g55330	GO:0016020
At3g15190	GO:0016020
At3g16140	GO:0016020
At5g33320	GO:0016020
At5g54190	GO:0016020
At5g08540	GO:0016020
At5g17170	GO:0016020
At1g06950	GO:0016043
At1g06430	GO:0016043
At1g14030	GO:0016043
At1g32500	GO:0016043
At1g54780	GO:0016043
At1g12410	GO:0016043
At1g06680	GO:0016043
At1g03130	GO:0016043
At1g03600	GO:0016043
At1g76100	GO:0016043
At1g52230	GO:0016043
At4g32640	GO:0016043
At2g30950	GO:0016043
At4g23100	GO:0016043
At2g43710	GO:0016043
At2g27680	GO:0016043
At4g35760	GO:0016043
At4g22890	GO:0016043
At4g11960	GO:0016043
At4g05180	GO:0016043
At4g03280	GO:0016043
At4g21280	GO:0016043
At4g12800	GO:0016043
At4g02770	GO:0016043
At2g20260	GO:0016043
At2g30790	GO:0016043
At3g44340	GO:0016043
At3g13490	GO:0016043
At3g48420	GO:0016043
At3g59400	GO:0016043
At3g56650	GO:0016043
At3g55330	GO:0016043
At3g16140	GO:0016043
At5g55220	GO:0016043
At5g48300	GO:0016043
At5g58330	GO:0016043
At5g27560	GO:0016043
At5g17170	GO:0016043
At5g52970	GO:0016043
At5g11260	GO:0016043
At1g76100	GO:0016049
At1g14030	GO:0016740
At2g41040	GO:0016740
At3g56040	GO:0016740
At5g48300	GO:0016740
At5g46290	GO:0016740
At1g06430	GO:0016787
At1g49970	GO:0016787
At1g02560	GO:0016787
At1g54780	GO:0016787
At1g12410	GO:0016787
At2g30950	GO:0016787
At3g48420	GO:0016787
At1g06430	GO:0019538
At1g49970	GO:0019538
At1g02560	GO:0019538
At1g54780	GO:0019538
At1g12410	GO:0019538
At1g18170	GO:0019538
At1g03600	GO:0019538
At2g30950	GO:0019538
At4g22890	GO:0019538
At4g11960	GO:0019538
At5g55220	GO:0019538
At1g03130	GO:0019725
At1g76100	GO:0019725
At4g05180	GO:0019725
At4g21280	GO:0019725
At4g12800	GO:0019725
At4g02770	GO:0019725
At2g20260	GO:0019725
At3g47470	GO:0019725
At1g06430	GO:0019748
At1g54780	GO:0019748
At1g67080	GO:0019748
At1g32550	GO:0019748
At1g50900	GO:0019748
At1g76100	GO:0019748
At2g30950	GO:0019748
At4g23100	GO:0019748
At4g32770	GO:0019748
At2g43710	GO:0019748
At2g27680	GO:0019748
At4g35760	GO:0019748
At4g22890	GO:0019748
At4g11960	GO:0019748
At4g03280	GO:0019748
At4g24930	GO:0019748
At3g48420	GO:0019748
At3g59400	GO:0019748
At3g55330	GO:0019748
At5g55220	GO:0019748
At5g48300	GO:0019748
At5g58330	GO:0019748
At5g17170	GO:0019748
At5g52970	GO:0019748
At5g11260	GO:0019748
At1g44446	GO:0030154
At1g76100	GO:0030154
At4g27440	GO:0030154
At3g59400	GO:0030154
At3g56650	GO:0030154
At5g54190	GO:0030154
At5g11260	GO:0030154
At2g39730	GO:0030234
